# Supplementary figures and images for: Silencing GMPPB Inhibits the Proliferation and Invasion of GBM via Hippo/MMP3 Pathways
Source: MDPI journal article supplement (doi:10.3390/ijms241914707), 2023-09-28

shGMPPB#1

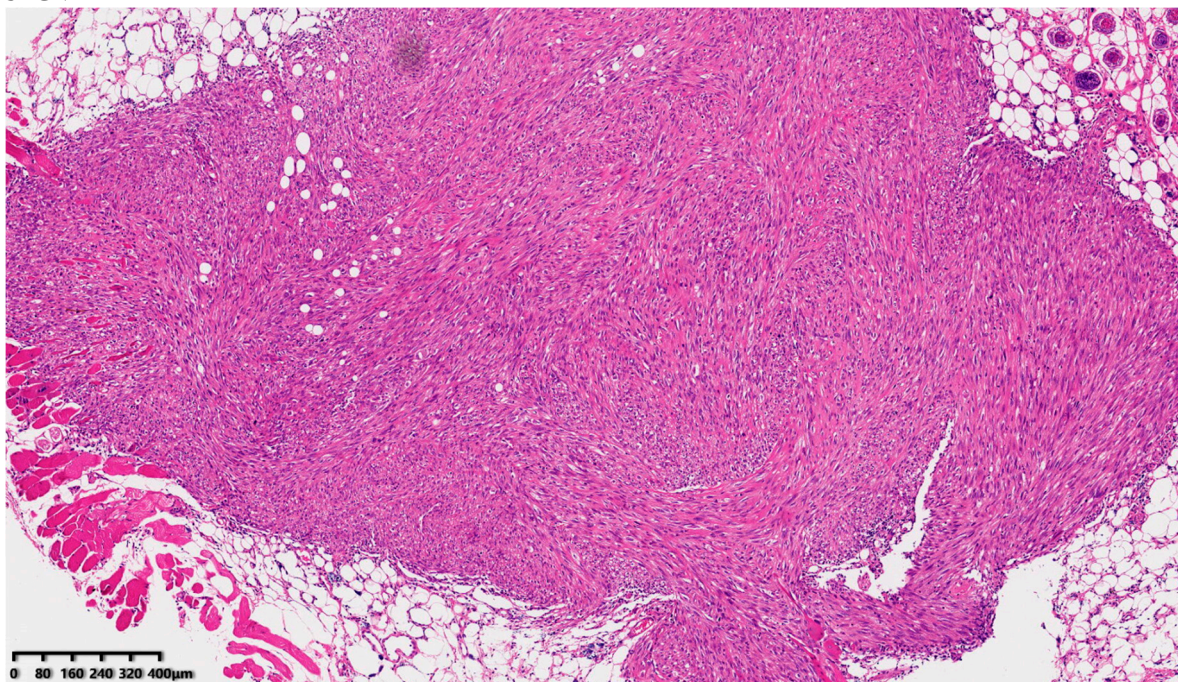

shNC

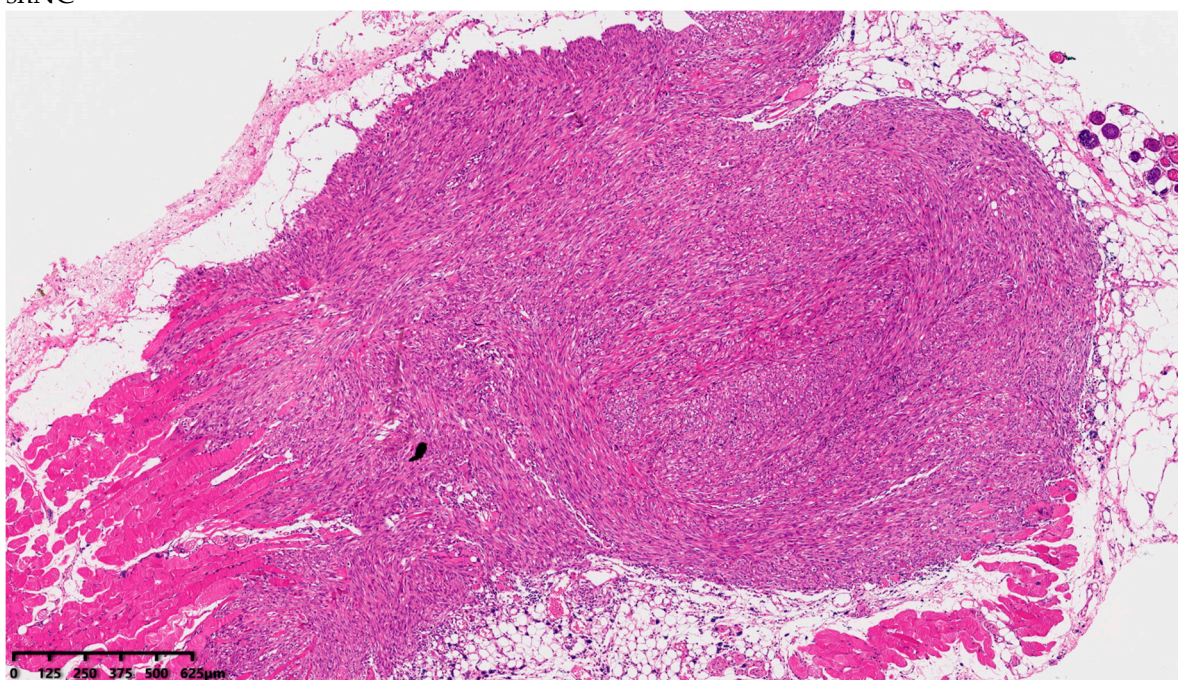

Supplement: s1 [file s1]

A172

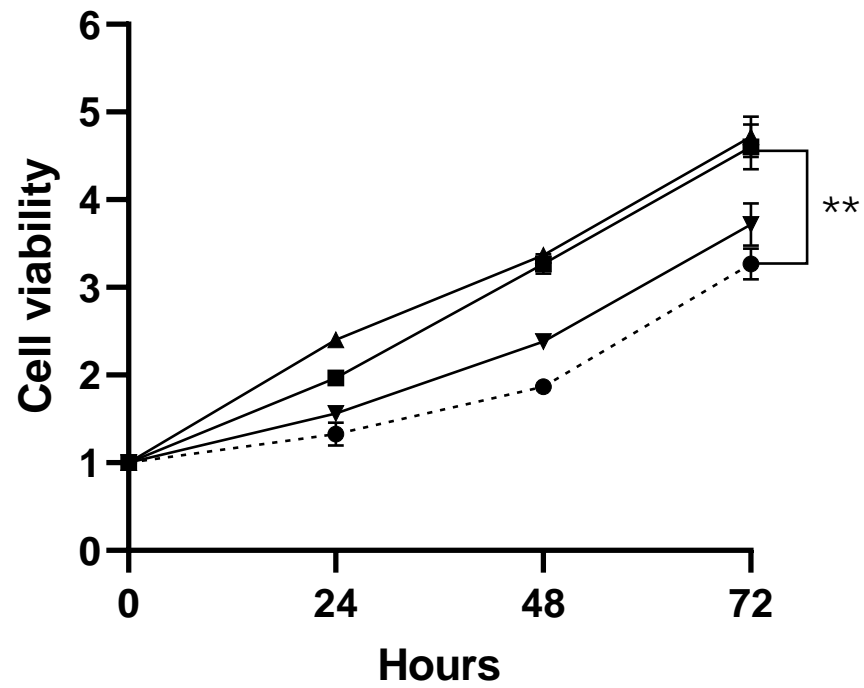

- ▲— GMPPB
- GMPPB+siNC
- ▼— vector
- - ● - - GMPPB+siMMP3

Supplement: s1 [file s1]
